# Supplementary material for: Facile synthesis and catalytic performance of Co3O4nanosheets in situ formed on reduced graphene oxide modified Ni foam
Source: Royal Society of Chemistry journal article supplement (doi:10.1039/c7dt03048g), 2017-01-01
Supplement: c7dt03048g1.pdf [file c7dt03048g1.pdf]

## Supporting information

### Facile synthesis and catalytic performance of $\text{Co}_3\text{O}_4$ nanosheets in-situ formed on reduced graphene oxide modified Ni foam

Congying Song, Xianzhi Yin, Biaopeng Li, Ke Ye, Kai Zhu, Dianxue Cao, Kui Cheng, Guiling Wang\*

*<sup>a</sup> Key Laboratory of Superlight Materials and Surface Technology of Ministry of Education, College of Materials Science and Chemical Engineering, Harbin*

*Engineering University, Harbin, 150001, P.R. China*

*Email: wangguiling@hrbeu.edu.cn*

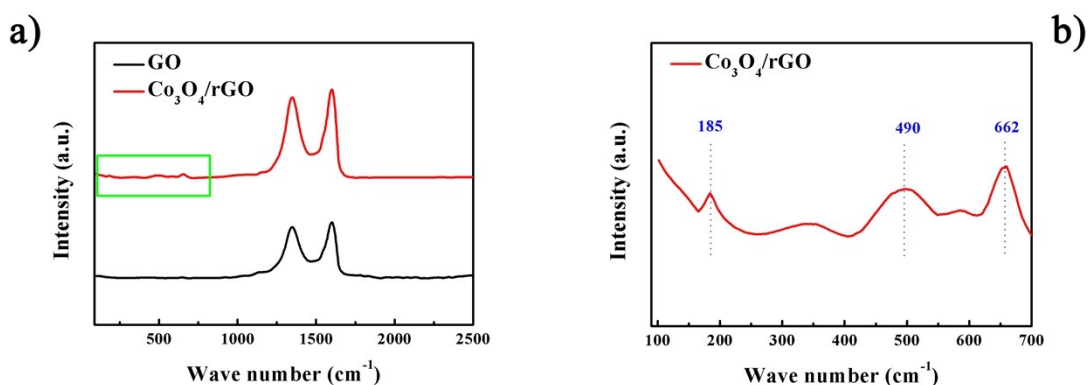

**Figure S1** Raman spectra of  $\text{Co}_3\text{O}_4/\text{rGO}$  and GO(a) and partial enlargement(b) of Figure S1(a)

Raman spectra of  $\text{Co}_3\text{O}_4/\text{rGO}$  and GO were measured and shown in the following Figure S1. On both spectra of  $\text{Co}_3\text{O}_4/\text{rGO}$  and GO, two remarkable peaks located at 1349 and 1598  $\text{cm}^{-1}$  referring to the D and G bands respectively. The D band is arose from the edge or defect sites of carbon and the G band corresponds to ordered  $\text{sp}^2$ -bonded carbon atoms. As seen from Figure S1(a), the spectra of  $\text{Co}_3\text{O}_4/\text{rGO}$  and GO are very similar. When enlarging the region in Figure S1(a) marked by green

rectangle, it can be found from Figure S1(b) that three peaks at 185, 490 and 670  $\text{cm}^{-1}$  which can be assigned to the  $E_g$ ,  $F_{2g}$  and  $A_{1g}$  modes of  $\text{Co}_3\text{O}_4$  indicating that  $\text{Co}_3\text{O}_4/\text{rGO}@Ni$  foam electrode was successfully prepared.

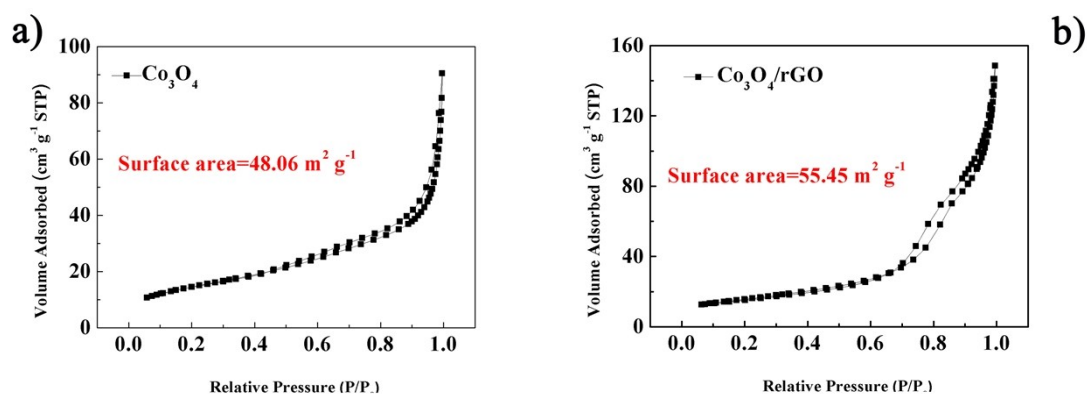

**Figure S2.** The  $\text{N}_2$  adsorption/desorption isotherms of  $\text{Co}_3\text{O}_4$ (a) and  $\text{Co}_3\text{O}_4/\text{rGO}$ (b).

To investigate the surface area of  $\text{Co}_3\text{O}_4@Ni$  foam and  $\text{Co}_3\text{O}_4/\text{rGO}@Ni$  foam,  $\text{N}_2$  isothermal adsorption-desorption measurements were conducted. The samples of  $\text{Co}_3\text{O}_4$  and  $\text{Co}_3\text{O}_4/\text{rGO}$  were obtained by scraping the powders from the Ni foam substrate. As seen from Figure S2, the  $\text{N}_2$  adsorption-desorption isotherms of both  $\text{Co}_3\text{O}_4$  and  $\text{Co}_3\text{O}_4/\text{rGO}$  exhibit typical IV isotherms, indicating the mesoporous structures of  $\text{Co}_3\text{O}_4$  and  $\text{Co}_3\text{O}_4/\text{rGO}$ . In addition, the results show a relatively high specific surface area of 55.45  $\text{m}^2 \text{g}^{-1}$  of  $\text{Co}_3\text{O}_4/\text{rGO}$  which is higher than that of  $\text{Co}_3\text{O}_4$ (48.06  $\text{m}^2 \text{g}^{-1}$ ). Thus, it can be concluded that the addition of rGO efficiently increases the surface area of the electrode and then leads to a better catalytic activity of the  $\text{Co}_3\text{O}_4/\text{rGO}@Ni$  foam electrode than  $\text{Co}_3\text{O}_4@Ni$  foam electrode.
